# Supplementary material for: School lives of adolescent school students living with chronic physical health conditions: a qualitative evidence synthesis
Source: HighWire-hosted journal article supplement (doi:10.1136/archdischild-2022-324874), 2022-12-02
Supplement: archdischild-2022-324874supp002_data_supplement.pdf [file archdischild-2022-324874supp002_data_supplement.pdf]

| Author (date)                                 | Title                                                                                                                                   | Country the study is based in | Relevant participant details                                                       | Data collection method                                                                                                                         | Key findings                                                                                                                                                                        |
|-----------------------------------------------|-----------------------------------------------------------------------------------------------------------------------------------------|-------------------------------|------------------------------------------------------------------------------------|------------------------------------------------------------------------------------------------------------------------------------------------|-------------------------------------------------------------------------------------------------------------------------------------------------------------------------------------|
| An and Lee (2019)                             | Difficulty in returning to school among adolescent leukaemia survivors: A qualitative descriptive study                                 | South Korea                   | 14 participants<br>14-22 y.o.<br>Leukaemia                                         | Semi-structured interviews<br>Thematic analysis                                                                                                | Feelings of alienation from friends<br>Difficulty in studying<br>Stuck being different from others<br>Apologetic feelings for family<br>Feelings of having an uncertain future      |
| Bessel (2001)                                 | Children surviving cancer: Psychosocial adjustment, quality of life, and school experiences                                             | US                            | 51 participants<br>8-17 y.o.<br>Cancer survivors                                   | Divided into 2 groups (8-12 y.o. and 13-17 y.o.).<br>Mixed methods<br>Interviews<br>Open coding category-generating process.                   | Helpfulness and understanding of teachers<br>Academic performance<br>Peer interaction and acceptance<br>Homebound instruction<br>Importance of attending school                     |
| Cameron (2019)                                | The psychosocial interactions of Adolescent and Young Adult (AYA) cancer survivors and the possible relationship with their development | New Zealand                   | 4 participants<br>16-19 y.o.<br>+ 6 participants<br>20-25 y.o.<br>Cancer survivors | Face-to-face interviews + one-year follow up interview.<br>Thematic analysis.                                                                  | Personal privacy and sharing of information<br>Independence<br>Identify formation<br>Positivity<br>Acknowledgement v being treated normally<br>Support instead of supporting others |
| Choquette, Rennick & Lee (2015)               | Back to School After Cancer Treatment: Making Sense of the Adolescent Experience                                                        | Canada                        | 11 participants<br>13-17 y.o.<br>Cancer survivors                                  | Face-to-face interviews.<br>Photo-elicitation.<br>Line-by-line, open and axial coding. Meaning-making theoretical model integrated as a guide. | Being on the right track to recovery<br>Bridging the two worlds<br>Establishing a new life at school                                                                                |
| Christian, B. J.; D'Auria, J. P. (1997)       | The child's eye: memories of growing up with cystic fibrosis                                                                            | US                            | 20 adolescents<br>12-18 y.o.<br>Cystic Fibrosis                                    | Retrospective interviews<br>Life event line used.<br>Field notes also taken.<br>Open coding, axial coding.                                     | Keeping secrets<br>Hiding visible differences<br>Discovering a new baseline                                                                                                         |
| Cotter (2016)                                 | The journey through school for children with cystic fibrosis : an interpretive phenomenological analysis                                | Ireland                       | 4 participants<br>11-16 y.o.<br>Cystic Fibrosis                                    | In-depth interview<br>IPA                                                                                                                      | Disruption to school life<br>Being in control<br>Reducing embarrassment<br>Friends supporting<br>Uncertainty<br>Goals and the future                                                |
| D'Auria, Christian, Henderson & Haynes (2000) | The company they keep: the influence of peer relationships on adjustment to cystic fibrosis during adolescence                          | US                            | 15 participants<br>17-22 y.o.<br>Cystic Fibrosis                                   | Third study in a series of 3 qualitative studies.<br>Interviews.<br>Constant comparative method<br>Thematising and coding                      | Losing ground<br>Being out the loop<br>Finding a new company of friends<br>Fighting a never-ending battle                                                                           |

|                                                                       |                                                                                                                               |           |                                                                 |                                                                                                                                                                                                    |                                                                                                                                                                                                                              |
|-----------------------------------------------------------------------|-------------------------------------------------------------------------------------------------------------------------------|-----------|-----------------------------------------------------------------|----------------------------------------------------------------------------------------------------------------------------------------------------------------------------------------------------|------------------------------------------------------------------------------------------------------------------------------------------------------------------------------------------------------------------------------|
| Dockett (2004)                                                        | "Everyone was really happy to see me!" The importance of friendships in the return to school of children with chronic illness | Australia | 10 young people<br>5-16 y.o.<br>Unspecified chronic conditions  | Face-to-face interviews.<br>Transcripts coded by 2 researchers.                                                                                                                                    | Positive and negative aspects of friendships<br>Feeling excited<br>Feeling nervous<br>Disclosure<br>Difficulties in maintaining friendships                                                                                  |
| Ferguson & Walker (2014)                                              | Getting on with life': resilience and normalcy in adolescents living with chronic illness                                     | Australia | 31 participants<br>10-18 y.o.<br>Unspecified chronic conditions | Longitudinal case studies<br>Informed by interviews of participants in 3 'waves' over 3 years (first one photo-elicitation)<br>Thematic coding<br>Both transcripts and materials (photos) analysed | Managing lives by focussing on opportunities<br>Influences, optimism and the future<br>Resistance to being seen as different<br>The role of school and peers<br>The interrelationship between normalcy and resilience        |
| Fleischman K., Smothers, M.K, Christianson, H. F. & Carter, L. (2011) | Experiences of Adolescents with Type 1 Diabetes as They Transition from Middle School to High School                          | US        | 6 participants<br>14-15 y.o.<br>Type 1 Diabetes                 | Interviews, structured<br>Themes, then core ideas/ summaries, then cross-analysis.                                                                                                                 | Transition<br>Identity<br>Support<br>Friends and peers<br>Disclosure<br>Self-care                                                                                                                                            |
| Forgeron, Evans, McGrath, Stevens & Finlay (2013)                     | Living with difference: Challenges to friendships for adolescents with pain                                                   | Canada    | 16 participants<br>14-18y.o.,<br>Chronic pain                   | Interviews<br>IPA                                                                                                                                                                                  | Rethinking the self with pain'<br>Integrating pain into the self<br>Understanding and sharing about chronic pain:<br><br>'Rethinking friendships'<br>Distancing the self<br>Needing a different quality in close friendships |
| Fottland (2000)                                                       | Childhood Cancer and the Interplay between Illness, Self-evaluation and Academic Experiences                                  | Norway    | 8 school children 11-19 y.o.<br>Cancer survivors                | Semi-structured interview<br>Young people interviewed individually and then parents introduced together and, lastly, hospital staff interviewed in groups.<br>Thematic                             | Attainment<br>Attendance<br>Lack of confidence<br>Peers<br>Catching up on social, physical and recreational activities a challenge                                                                                           |
| Gabe, Bury & Ramsay (2002)                                            | Living with asthma: The experiences of young people at home and at school                                                     | UK        | 55 participants<br>11-16 y.o.<br>Asthma                         | Interviews<br>Thematic analysis                                                                                                                                                                    | Experiencing asthma<br>Explaining asthma<br>Management of asthma                                                                                                                                                             |
| Gathercole (2017)                                                     | The educational experiences of children with cystic fibrosis                                                                  | UK        | 5 participants<br>9-17 y.o.<br>Cystic Fibrosis                  | Online semi-structured interviews<br>Option for photovoice<br>Mixed analytical methods (thematic)                                                                                                  | Being me first<br>Balancing treatments and school activities<br>Staying well at school<br>Knowing about CF<br>CF impacting learning<br>Educational support<br>Negotiating CF alongside adolescence                           |

|                                                                         |                                                                                                                                         |         |                                                                                                   |                                                                                                                                                                                                           |                                                                                                                                                                                                                                                                            |
|-------------------------------------------------------------------------|-----------------------------------------------------------------------------------------------------------------------------------------|---------|---------------------------------------------------------------------------------------------------|-----------------------------------------------------------------------------------------------------------------------------------------------------------------------------------------------------------|----------------------------------------------------------------------------------------------------------------------------------------------------------------------------------------------------------------------------------------------------------------------------|
| Glasson (1995)                                                          | A descriptive and exploratory pilot study into school re-entrance for adolescents who have received treatment for cancer                | UK      | 5 adolescents<br>12-16 y.o.<br>Cancer                                                             | Semi-structured interviews.<br>Grounded theory, exploratory and descriptive.<br>Analysed emerging conceptual categories.                                                                                  | Disruption<br>Behind in school work<br>Normality                                                                                                                                                                                                                           |
| Holley, Walker, Knibb, Latter, Liossi, Mitchell, Radley, Roberts (2018) | Barriers and facilitators to self-management of asthma in adolescents: An interview study to inform development of a novel intervention | UK      | 28 participants<br>12-18 y.o.<br>Asthma                                                           | Focus groups and interviews<br>Inductive thematic analysis                                                                                                                                                | Forgetting treatment<br>Managing medication<br>Knowledge<br>Difficulty concentrating<br>School staff, understanding and support at school                                                                                                                                  |
| Holmstrom & Soderberg (2021)                                            | The lived experiences of young people living with type 1 diabetes: A hermeneutic study                                                  | Sweden  | 10 participants<br>13-18 y.o.<br>Type 1 Diabetes                                                  | In-depth, open-ended, qualitative interviews.<br>Thematic analysis.                                                                                                                                       | Living a transformed and re-organised everyday life<br>Feeling new emotions in the body<br>Living a governed everyday life<br>Being affected as a person<br>Being met with understanding and support<br>Informing about diabetes is important<br>School can be problematic |
| Kime (2014)                                                             | 'Join us on our journey': exploring the experiences of children and young people with type 1 diabetes and their parents                 | England | 116 participants<br>6-25 y.o.<br>Type 1 Diabetes                                                  | 3 year multisite study. Nine acute trusts across Yorkshire and the Humber region.<br>Talking groups (term coined by the young people) separated by age (6-11, 12-14, 15-17, 18-25).<br>Thematic analysis. | Diabetes care<br>Education<br>Communication and support<br>School<br>Transition                                                                                                                                                                                            |
| Kuntz, Anazodo, Bowden, Sender & Morgan (2019)                          | Paediatric Cancer Patients' Treatment Journey: Child, Adolescent, and Young Adult Cancer Narratives                                     | US      | 30 participants<br>10-25 y.o.<br>Leukaemia, Solid Tumours                                         | Semi-structured interviews.<br>Transcripts analysed in detail by each member of team.<br>Thematic analysis. Peer evaluations.                                                                             | Activity challenges<br>Disconnection from school:<br><br>Importance of storytelling<br>Communication challenges<br>The value of altruism towards patients in the future                                                                                                    |
| Kyngas (2004)                                                           | Support network of adolescents with chronic disease: adolescents' perspective                                                           | Finland | 40 participants<br>13-17 y.o.<br>Asthma, Epilepsy, Juvenile Rheumatoid Arthritis, Type 1 Diabetes | Interviews dealt with 2 topics: everyday life with a chronic disease and informant's support network.<br>Content analysis.                                                                                | Peers:<br>Fellow sufferers<br>Friends without chronic condition<br><br>School:<br>Sometimes used condition as an excuse<br>Comfort in nurse knowing<br>Acceptance from peers v. teasing and causing trouble                                                                |

|                                                   |                                                                                                                                                                                 |              |                                                                                                                   |                                                                                                                                             |                                                                                                                                                                                                                                         |
|---------------------------------------------------|---------------------------------------------------------------------------------------------------------------------------------------------------------------------------------|--------------|-------------------------------------------------------------------------------------------------------------------|---------------------------------------------------------------------------------------------------------------------------------------------|-----------------------------------------------------------------------------------------------------------------------------------------------------------------------------------------------------------------------------------------|
| Lakeman (2021)                                    | The school experiences of young people with a chronic health condition : an interpretative phenomenological analysis                                                            | UK           | 5 participants<br>13-16 y.o.<br>Type 1 Diabetes, Epilepsy, Cerebral Palsy, Mitochondrial Genetic disease          | Semi-structured interviews, creative task to prepare. IPA.                                                                                  | Autonomy<br>Relationships and belonging<br>Navigating the School Day<br>Emotional Wellbeing at School<br>Planning for the Future                                                                                                        |
| Li, Lopez, Chung, Ho & Chiu (2013)                | The impact of cancer on the physical, psychological and social well-being of childhood cancer survivors                                                                         | China        | 15 participants<br>8-16 y.o.<br>Leukaemia, Lymphoma, Brain Tumour, Osteosarcomas, Kidney Tumour, Germ-cell Tumour | Semi-structured interview<br>Content analysis<br>Peer debriefing                                                                            | For most, some impact on academic performance and pay extra efforts to keep up                                                                                                                                                          |
| Lightfoot, Wright & Sloper (1999)                 | Supporting pupils in mainstream school with an illness or disability: young people's views                                                                                      | UK           | 33 participants<br>11-16 y.o.<br>Unspecified chronic condition, physical disability                               | Semi-structured interviews<br>Framework analysis                                                                                            | Absence<br>Exclusion<br>Relationships with teachers<br>Relationships with peers                                                                                                                                                         |
| MacMillan, Kirk, Mutrie, Moola & Robertson (2015) | Supporting Participation in Physical Education at School in Youth with Type 1 Diabetes: Perceptions of Teachers, Youth with Type 1 Diabetes, Parents and Diabetes Professionals | Scotland, UK | 16 participants<br>7-14 y.o.<br>Type 1 Diabetes                                                                   | Interviews for young people (also focus groups with teachers, FG and int with health care professionals). Constructivist thematic analysis. | Differences between primary and secondary schools<br>Areas requiring address in all schools<br>What teachers can do to help accommodate youth with type 1 diabetes<br>What schools can do to help accommodate youth with type1 diabetes |
| Newbould, Francis & Smith (2007)                  | Young people's experiences of managing asthma and diabetes at school                                                                                                            | UK           | 69 participants<br>8-15 y.o.<br>Asthma and Diabetes                                                               | Interviews with young people (and separate interviews with parents). . .<br>Coding and thematising                                          | Access to medication whilst at school<br>Use of medication at school<br>Impact on regimen<br>Role of teachers and 'informed friends'<br>Exercise<br>School trips<br>Being different                                                     |
| Pini, Gardner & Hugh-Jones (2019)                 | How and Why School Is Important to Teenagers with Cancer: Outcomes from a Photo-Elicitation Study                                                                               | UK           | 12 participants<br>13-16 y.o.<br>Leukaemia, Lymphoma, Soft Tissue Sarcoma or Bone Tumor                           | Photo-elicitation interviews 2, 6, and 9 months post-diagnosis. IPA.<br>9 participants completed 3 interviews, 3 completed 1.               | Falling behind<br>Controlling the story<br>Conflicting priorities<br>Maintaining educational pace<br>A paused life?<br>Finding a way to be the same but changed<br>Legacy of missed schooling                                           |

|                                                                          |                                                                                                                                        |        |                                                                                                                                 |                                                                                                                                                                                                                                            |                                                                                                                                                                                                                                                                   |
|--------------------------------------------------------------------------|----------------------------------------------------------------------------------------------------------------------------------------|--------|---------------------------------------------------------------------------------------------------------------------------------|--------------------------------------------------------------------------------------------------------------------------------------------------------------------------------------------------------------------------------------------|-------------------------------------------------------------------------------------------------------------------------------------------------------------------------------------------------------------------------------------------------------------------|
| Pini, Gardner, Hugh-Jones (2016)                                         | How teenagers continue school after a diagnosis of cancer: experiences of young people and recommendations for practice                | UK     | 12 participants<br>13-16 y.o.<br>Leukaemia, Lymphoma, Soft Tissue Sarcoma, Bone Tumour                                          | Longitudinal, photo-elicitation study with interviews over three time points.<br>1 interview in first 2 months of diagnosis, one approx 6 months post diagnosis, one at approx 9 months post diagnosis.<br>IPA                             | Regulation and calibration<br>Regulatory importance of exams and grading<br>Belonging to the school community<br>Damaging effect of miscommunications<br>Changing peer dynamics and norms<br>Adapting to altered appearances<br>Special consideration v normality |
| Pini, Hugh-Jones, Shearsmith, Gardner (2019)                             | What are you crying for? I don't even know you' - The experiences of teenagers communicating with their peers when returning to school | UK     | 12 participants<br>13-16 y.o.<br>Lymphoma, Hodgkin's Lymphoma, Osteosarcoma, A-plastic Anaemia or Acute Lymphoblastic Leukaemia | Photo-elicitation, interviews conducted at 3 time points during the year.<br>Following diagnosis of lymphoma, Hodgkin's lymphoma, osteosarcoma, A-plastic anaemia, or acute lymphoblastic leukaemia.<br>IPA.                               | Approaches to telling<br>Lives becoming public property<br>Owning the story                                                                                                                                                                                       |
| Ragni Cappelletti, De Stasio, Tondo, Specchio, Vigeveno & Gentile (2020) | The impact of epilepsy on adolescence: a quali-quantitative investigation using focus group                                            | Italy  | 8 participants<br>15-20 y.o.<br>Epilepsy                                                                                        | Mixed methods:<br>qualitative, focus groups<br>quantitative, self-report<br>questionnaire<br>Thematic coding                                                                                                                               | Peer relationships and acceptance<br>Autonomy<br>School as bad place to have a seizure<br>Lack of staff skills<br>Concern over academic achievement<br>Future                                                                                                     |
| Secor-Turner, Scal, Garwick, Horvath & Kellerman Wells (2011)            | Living With Juvenile Arthritis: Adolescents' Challenges and Experiences                                                                | US     | 7 participants<br>14-21 y.o.<br>Juvenile Arthritis                                                                              | 2 Focus groups, semi-structured interview protocol. 1 x 14-21 y.o. and 1x 22-29 y.o.<br>Descriptive content analysis                                                                                                                       | Challenges included playing sports/ participating, doing schoolwork and talking to teachers<br>Pain impeded ability to complete some work<br>Management of pain and exercising                                                                                    |
| Vera et al. (2015)                                                       | The lived experience of pain in adolescents diagnosed with cystic fibrosis                                                             | US     | 5 participants<br>13-19 y.o.<br>Cystic Fibrosis                                                                                 | Exploratory descriptive design.<br>Interviews exploring pain experiences within 5 domains: pain characteristics, activities, relationships, work/school life and healthcare team<br>Content analysis with team-based constant comparisons. | Negative impact of restrictions in daily life<br>Social life and emotional toll - missing school functions, social activities and sports<br>Disclosure to teachers                                                                                                |
| Wakefield, Puhl, Litt & Zempsky (2020)                                   | "If it ever really hurts, I try not to let them know:" The use of concealment as a coping strategy among adolescents with Chronic Pain | Canada | 18 participants<br>12-17 y.o.<br>Chronic Pain                                                                                   | 5 focus groups of 3-5 adolescents.<br>Directed content analysis, inductive content analysis.                                                                                                                                               | Avoidance of judgement<br>Avoidance of being a social burden<br>Desire to be treated normally<br>Social isolation<br>Cognitive burden                                                                                                                             |

|                         |                                                                                                                                                    |           |                                                                                                                                                            |                                                                                                                          |                                                                                                                                                                                          |
|-------------------------|----------------------------------------------------------------------------------------------------------------------------------------------------|-----------|------------------------------------------------------------------------------------------------------------------------------------------------------------|--------------------------------------------------------------------------------------------------------------------------|------------------------------------------------------------------------------------------------------------------------------------------------------------------------------------------|
| Wilkie (2012)           | "Absence Makes the Heart Grow Fonder": Students with Chronic Illness Seeking Academic Continuity through Interaction with Their Teachers at School | Australia | 11 participants<br>Year 10-12<br>Cancer,<br>Anorexia Nervosa,<br>Conversion Disorder, Renal Failure, Multiple Sclerosis and Cochlear implant complications | A qualitative collective case study of students and their teachers, involving observations, interview and questionnaire. | Teachers finding out<br>Teacher concern<br>Ambiguity of school and teacher responsibility                                                                                                |
| Winger et al (2013)     | Sometimes it feels as if the world goes on without me': adolescents' experiences of living with chronic fatigue syndrome                           | Norway    | 18 participants<br>12-18 y.o.<br>Chronic Fatigue Syndrome                                                                                                  | In-depth interviews                                                                                                      | Being forgotten by friends, school teachers and family members<br>Teaching staff not understanding<br>Reduced school attendance<br>Feeling left behind by peers<br>Some positive aspects |
| Zhu & Van Winkel (2015) | Using an ICT tool as a solution for the educational and social needs of long-term sick adolescents                                                 | Belgium   | 8 participants<br>12-19 y.o.<br>Fibromyalgia, CVS, CRPS, Vascular problems, Hodgkin's, Operation leg extension, Depressive symptoms, Auto-immune disease   | Online survey (young people) and interviews (young people and parents separately)                                        | maintaining connection with school<br>Peers and social contact<br>School community                                                                                                       |
